# Supplementary material for: Systematic Review and Meta-Analysis on the Association between Polymorphisms in Genes of IL-12 Signaling Pathway and Hepatocellular Carcinoma Risk
Source: PubMed Central journal article supplement — J Cancer. 2018 Sep 8;9(19):3583–92. doi: 10.7150/jca.26419 (PMC6171029; doi:10.7150/jca.26419), 2018-09-08
Supplement: jcav09p3583s1.pdf [file jcav09p3583s1.pdf]

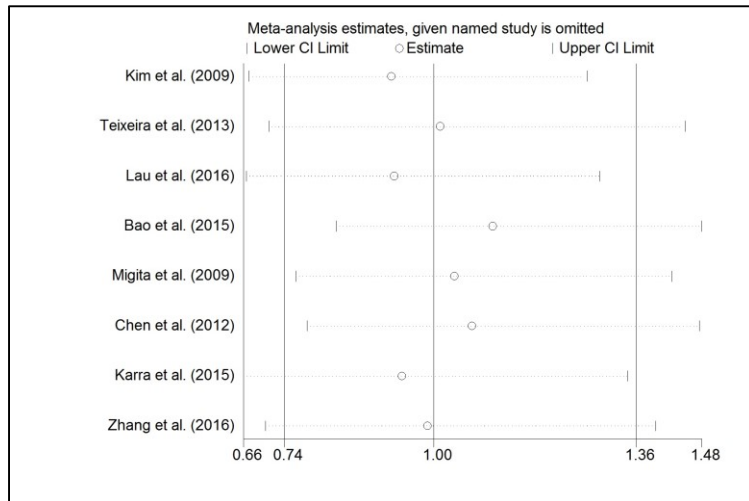

IL18 rs187238

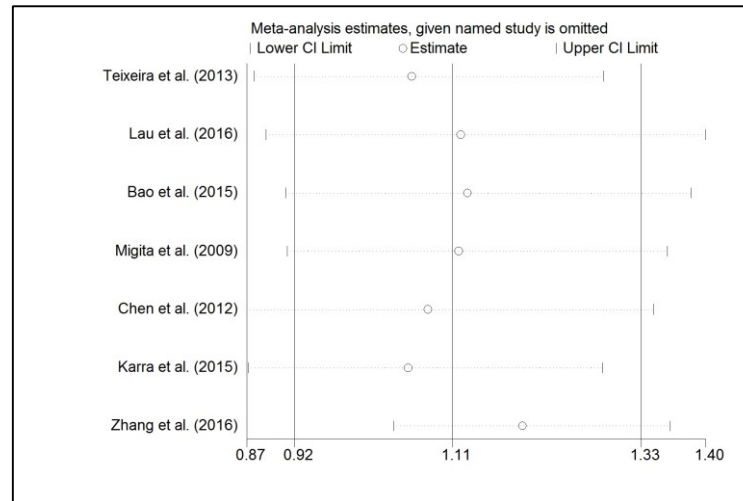

IL18 rs1946518

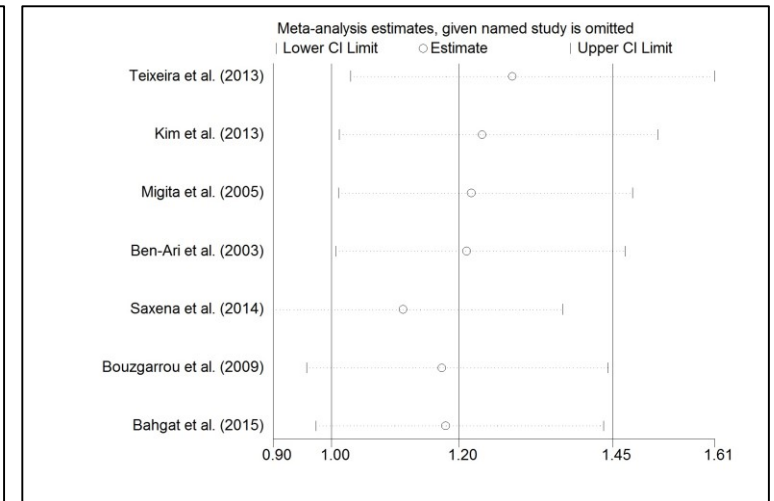

IFN- $\gamma$  rs2430561

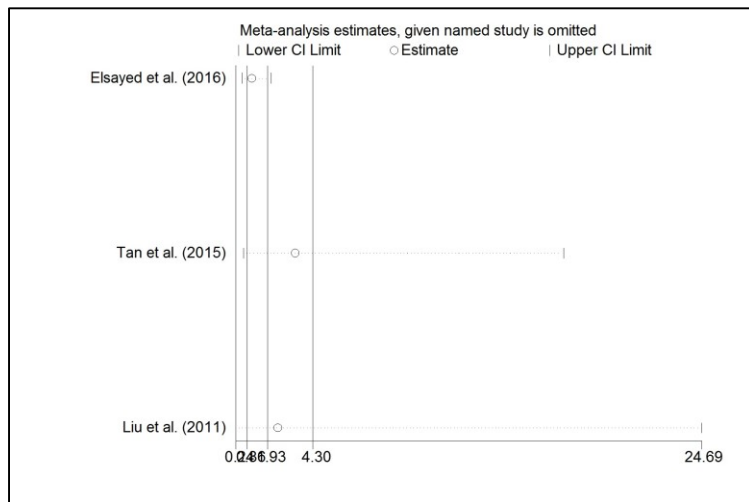

IL12A rs568408

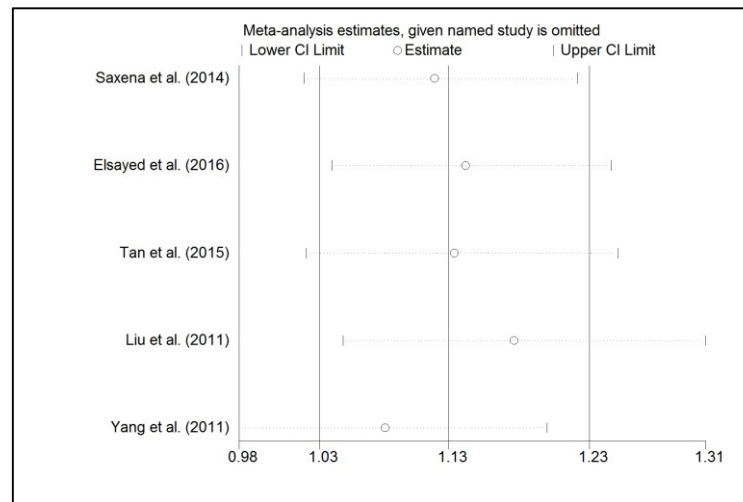

IL12B rs3212227

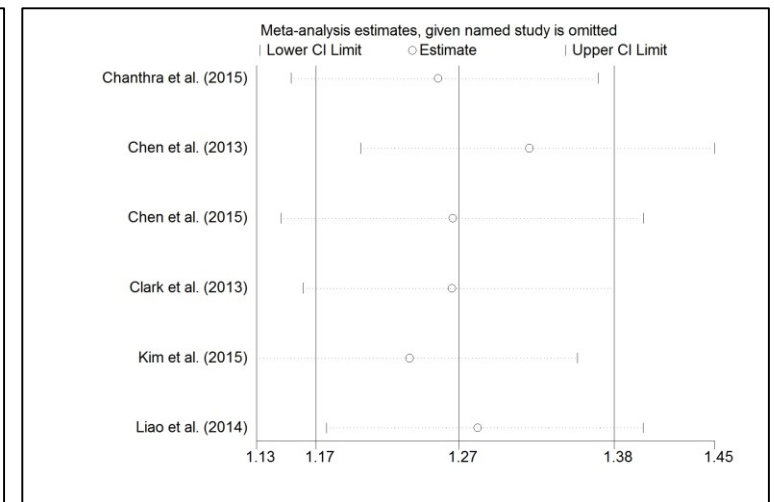

STAT4 rs7574865

**Supplementary figure 1. Sensitivity Analysis of Overall OR Co-Efficients for 6 polymorphisms of IL-12 pathway genes (M vs. W). Results were calculated by omitting each study in turn. The two ends of the dotted lines represent the 95% CI.**

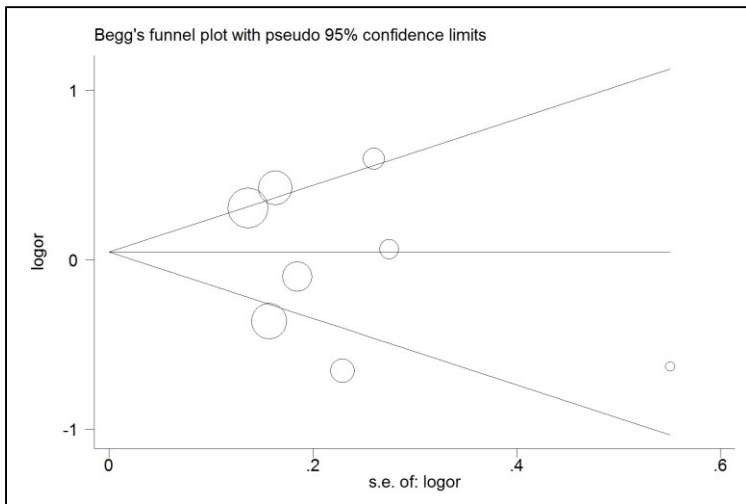

IL18 rs187238

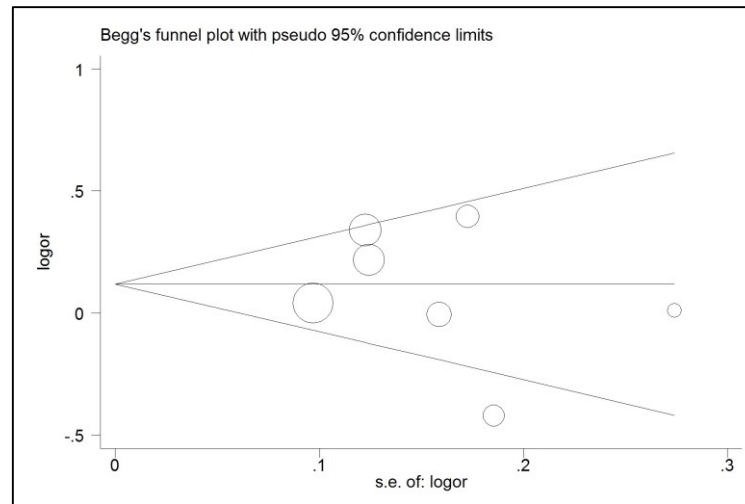

IL18 rs1946518

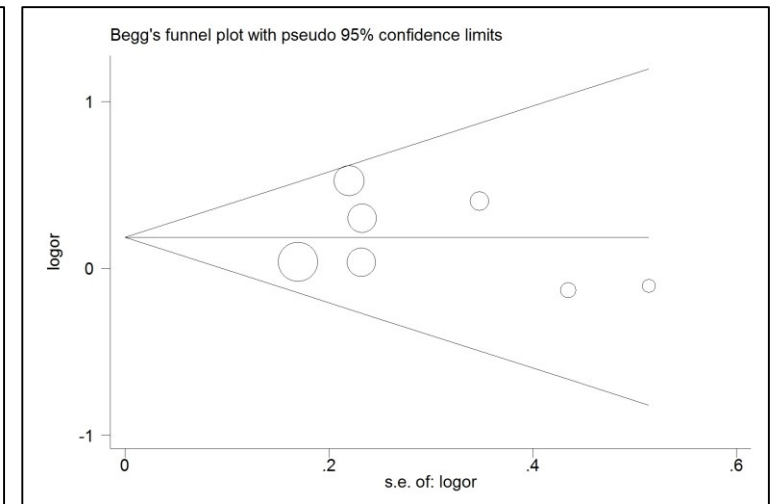

IFN- $\gamma$  rs2430561

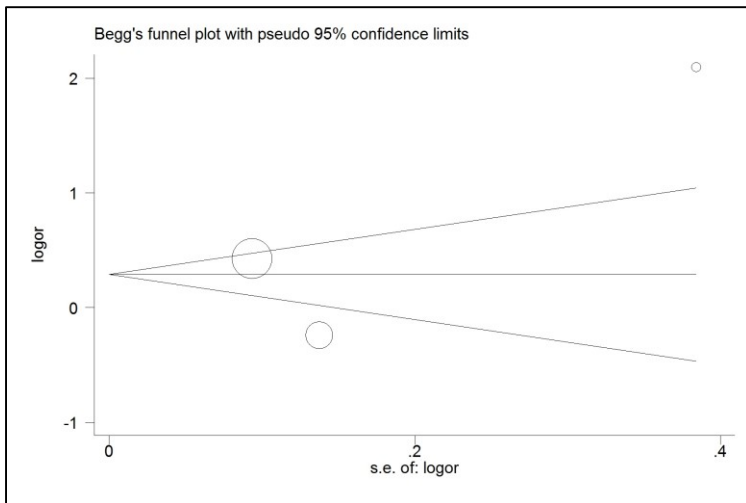

IL12A rs568408

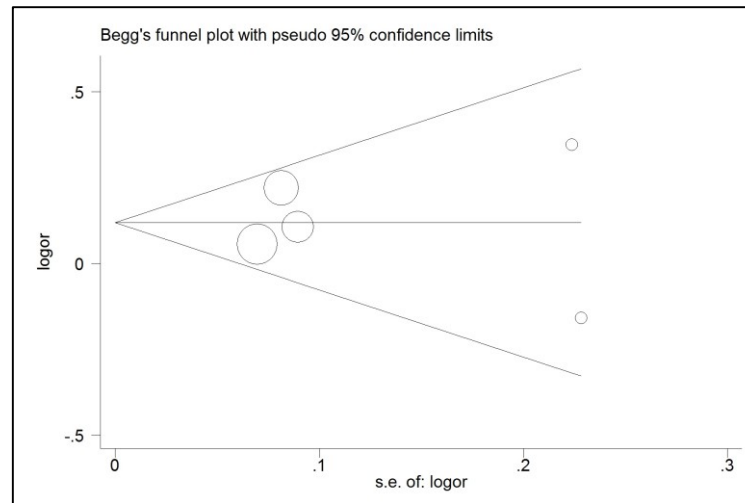

IL12B rs3212227

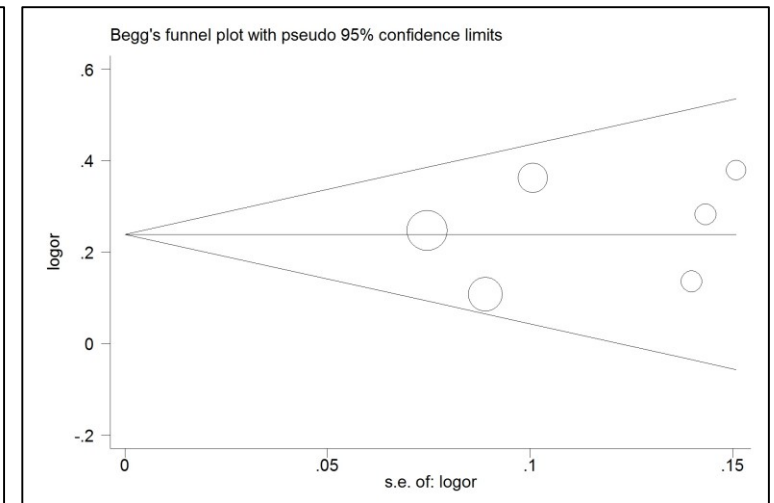

STAT4 rs7574865

**Supplementary figure 2. Begg's funnel plot for publication bias test under 6 polymorphisms of IL-12 pathway gene (M vs. W).** The x-axis is  $\log(\text{OR})$ , and the y-axis is natural logarithm of OR. The horizontal line in the figure represents the overall estimated  $\log(\text{OR})$ . The two diagonal lines indicate the pseudo 95% confidence limits of the effect estimate.  $\log(\text{OR}) = \log$ -transformed OR, OR = odds ratio.



|                  |                                   |                   |   |    |    |    |    |   |    |
|------------------|-----------------------------------|-------------------|---|----|----|----|----|---|----|
|                  | Teixeira <i>et al.</i>            | *                 | * | *  | *  | ** | *  | * | NA |
|                  | Kim <i>et al.</i>                 | *                 | * | NA | *  | *  | *  | * | NA |
|                  | Migita <i>et al.</i>              | *                 | * | NA | *  | *  | *  | * | NA |
| <b>rs2430561</b> | Ben-Ari <i>et al.</i>             | *                 | * | *  | *  | *  | *  | * | NA |
|                  | Nieters <i>et al.</i>             | *                 | * | NA | *  | ** | NA | * | NA |
|                  | Saxena <i>et al.</i>              | *                 | * | *  | NA | *  | *  | * | NA |
|                  | Bouzgarrou <i>et al.</i>          | *                 | * | *  | *  | *  | *  | * | NA |
|                  | Bahgat <i>et al.</i>              | *                 | * | *  | *  | *  | *  | * | NA |
|                  | Heba Mosaad Elsayed <i>et al.</i> | *                 | * | *  | *  | ** | *  | * | NA |
|                  |                                   | Tan <i>et al.</i> | * | *  | *  | *  | ** | * | *  |
| <b>rs568408</b>  | Liu <i>et al.</i>                 | *                 | * | *  | *  | ** | *  | * | NA |
|                  | Saxena <i>et al.</i>              | *                 | * | *  | *  |    | *  | * | NA |
|                  | Heba Mosaad Elsayed <i>et al.</i> | *                 | * | *  | *  | ** | *  | * | NA |
| <b>rs3212227</b> | Alexandra Nieters <i>et al.</i>   | *                 | * | *  | *  | *  | NA | * | NA |
|                  | Tan <i>et al.</i>                 | *                 | * | *  | *  | ** | *  | * | NA |
|                  | Simona Ognjanovic <i>et al.</i>   | *                 | * | *  | *  | ** | NA | * | NA |
|                  | Liu <i>et al.</i>                 | *                 | * | *  | *  | ** | *  | * | NA |

|           |                        |   |   |    |   |    |    |   |    |
|-----------|------------------------|---|---|----|---|----|----|---|----|
|           | Yang <i>et al.</i>     | * | * | NA | * | ** | *  | * | NA |
|           | Chanthra <i>et al.</i> | * | * | *  | * | *  | *  | * | NA |
|           | Chen <i>et al.</i>     | * | * | NA | * | ** | *  | * | NA |
| rs7574865 | Chen <i>et al.</i>     | * | * | *  | * | ** | *  | * | NA |
|           | Clark <i>et al.</i>    | * | * | NA | * | *  | *  | * | NA |
|           | Kim <i>et al.</i>      | * | * | *  | * | *  | NA | * | NA |
|           | Liao <i>et al.</i>     | * | * | *  | * | *  | *  | * | NA |

---

NA: not mentioned.

**Table S2.** Sensitivity analysis for current meta-analysis.

| <b>Polymorphism</b> | <b>Comparison</b>      | <b>Study omitted</b>   | <b>Estimate</b> | <b>95%CI</b> | <b>Effect Model</b> |
|---------------------|------------------------|------------------------|-----------------|--------------|---------------------|
| rs1946518           | M VS. W                | Teixeira <i>et al.</i> | 1.060           | 0.875-1.285  | Random              |
|                     |                        | Lau <i>et al.</i>      | 1.117           | 0.889-1.404  |                     |
|                     |                        | Bao <i>et al.</i>      | 1.125           | 0.912-1.387  |                     |
|                     |                        | Migita <i>et al.</i>   | 1.115           | 0.914-1.360  |                     |
|                     |                        | Chen <i>et al.</i>     | 1.079           | 0.867-1.343  |                     |
|                     |                        | Karra <i>et al.</i>    | 1.055           | 0.868-1.283  |                     |
|                     |                        | Zhang <i>et al.</i>    | 1.190           | 1.038-1.363  |                     |
|                     | MM vs. WW              | Teixeira <i>et al.</i> | 1.123           | 0.751-1.679  | Random              |
|                     |                        | Lau <i>et al.</i>      | 1.307           | 0.766-2.231  |                     |
|                     |                        | Bao <i>et al.</i>      | 1.323           | 0.809-2.161  |                     |
|                     |                        | Migita <i>et al.</i>   | 1.304           | 0.826-2.059  |                     |
|                     |                        | Chen <i>et al.</i>     | 1.211           | 0.730-2.008  |                     |
|                     |                        | Karra <i>et al.</i>    | 1.150           | 0.728-1.818  |                     |
|                     |                        | Zhang <i>et al.</i>    | 1.480           | 1.044-2.099  |                     |
| WM vs. WW           | Teixeira <i>et al.</i> | 1.152                  | 0.900-1.473     | Random       |                     |

|              |                        |       |             |        |
|--------------|------------------------|-------|-------------|--------|
|              | Lau <i>et al.</i>      | 1.206 | 0.939-1.549 |        |
|              | Bao <i>et al.</i>      | 1.172 | 0.921-1.491 |        |
|              | Migita <i>et al.</i>   | 1.149 | 0.914-1.445 |        |
|              | Chen <i>et al.</i>     | 1.113 | 0.880-1.408 |        |
|              | Karra <i>et al.</i>    | 1.086 | 0.884-1.335 |        |
|              | Zhang <i>et al.</i>    | 1.233 | 1.029-1.479 |        |
|              | Teixeira <i>et al.</i> | 1.135 | 0.850-1.515 |        |
|              | Lau <i>et al.</i>      | 1.203 | 0.887-1.633 |        |
|              | Bao <i>et al.</i>      | 1.194 | 0.895-1.592 |        |
| MM+MW vs. WW | Migita <i>et al.</i>   | 1.169 | 0.888-1.538 | Random |
|              | Chen <i>et al.</i>     | 1.121 | 0.839-1.497 |        |
|              | Karra <i>et al.</i>    | 1.095 | 0.844-1.420 |        |
|              | Zhang <i>et al.</i>    | 1.283 | 1.080-1.524 |        |
|              | Teixeira <i>et al.</i> | 1.062 | 0.833-1.353 |        |
| MM vs. MW+WW | Lau <i>et al.</i>      | 1.179 | 0.797-1.744 | Random |
|              | Bao <i>et al.</i>      | 1.199 | 0.843-1.707 |        |
|              | Migita <i>et al.</i>   | 1.191 | 0.864-1.642 |        |

|          |                      |                        |             |             |        |
|----------|----------------------|------------------------|-------------|-------------|--------|
| rs187238 | M VS. W              | Chen <i>et al.</i>     | 1.140       | 0.787-1.651 | Random |
|          |                      | Karra <i>et al.</i>    | 1.086       | 0.779-1.515 |        |
|          |                      | Zhang <i>et al.</i>    | 1.263       | 0.958-1.665 |        |
|          |                      | Kim <i>et al.</i>      | 0.926       | 0.674-1.272 |        |
|          |                      | Teixeira <i>et al.</i> | 1.013       | 0.709-1.447 |        |
|          |                      | Lau <i>et al.</i>      | 0.931       | 0.669-1.294 |        |
|          |                      | Bao <i>et al.</i>      | 1.106       | 0.828-1.476 |        |
|          | MM vs. WW            | Migita <i>et al.</i>   | 1.038       | 0.757-1.423 | Random |
|          |                      | Chen <i>et al.</i>     | 1.069       | 0.776-1.471 |        |
|          |                      | Karra <i>et al.</i>    | 0.945       | 0.664-1.345 |        |
|          |                      | Zhang <i>et al.</i>    | 0.990       | 0.703-1.394 |        |
|          |                      | Kim <i>et al.</i>      | 0.920       | 0.600-1.408 |        |
|          |                      | Teixeira <i>et al.</i> | 1.145       | 0.658-1.994 |        |
|          |                      | Lau <i>et al.</i>      | 1.037       | 0.596-1.805 |        |
|          | Bao <i>et al.</i>    | 1.113                  | 0.666-1.861 | Random      |        |
|          | Migita <i>et al.</i> | 1.034                  | 0.612-1.748 |             |        |
|          | Chen <i>et al.</i>   | 1.081                  | 0.591-1.979 |             |        |



|              |                        |       |             |        |
|--------------|------------------------|-------|-------------|--------|
|              | Karra <i>et al.</i>    | 0.951 | 0.53-1.704  |        |
|              | Zhang <i>et al.</i>    | 1.084 | 0.64-1.836  |        |
|              | Kim <i>et al.</i>      | 0.917 | 0.588-1.432 |        |
|              | Teixeira <i>et al.</i> | 0.977 | 0.61-1.565  |        |
|              | Lau <i>et al.</i>      | 0.899 | 0.577-1.402 |        |
| WM vs. WW    | Bao <i>et al.</i>      | 1.117 | 0.757-1.65  | Random |
|              | Migita <i>et al.</i>   | 1.049 | 0.694-1.586 |        |
|              | Chen <i>et al.</i>     | 1.099 | 0.742-1.627 |        |
|              | Karra <i>et al.</i>    | 0.904 | 0.574-1.424 |        |
|              | Zhang <i>et al.</i>    | 0.950 | 0.604-1.496 |        |
|              | Kim <i>et al.</i>      | 0.913 | 0.601-1.389 |        |
|              | Teixeira <i>et al.</i> | 0.993 | 0.633-1.559 |        |
|              | Lau <i>et al.</i>      | 0.909 | 0.594-1.392 |        |
| MM+MW vs. WW | Bao <i>et al.</i>      | 1.120 | 0.773-1.623 | Random |
|              | Migita <i>et al.</i>   | 1.047 | 0.702-1.563 |        |
|              | Chen <i>et al.</i>     | 1.090 | 0.740-1.606 |        |
|              | Karra <i>et al.</i>    | 0.914 | 0.592-1.409 |        |

|           |              |                          |       |             |        |
|-----------|--------------|--------------------------|-------|-------------|--------|
|           |              | Zhang <i>et al.</i>      | 0.967 | 0.625-1.495 |        |
|           |              | Kim <i>et al.</i>        | 0.912 | 0.600-1.388 |        |
|           |              | Teixeira <i>et al.</i>   | 1.122 | 0.705-1.786 |        |
|           |              | Lau <i>et al.</i>        | 1.024 | 0.632-1.659 |        |
|           | MM vs. MW+WW | Bao <i>et al.</i>        | 1.062 | 0.607-1.684 | Random |
|           |              | Migita <i>et al.</i>     | 1.012 | 0.639-1.603 |        |
|           |              | Chen <i>et al.</i>       | 1.000 | 0.590-1.696 |        |
|           |              | Karra <i>et al.</i>      | 0.991 | 0.578-1.700 |        |
|           |              | Zhang <i>et al.</i>      | 1.056 | 0.672-1.659 |        |
|           |              | Teixeira <i>et al.</i>   | 1.230 | 1.023-1.479 |        |
|           |              | Kim <i>et al.</i>        | 1.204 | 1.013-1.431 |        |
|           |              | Migita <i>et al.</i>     | 1.195 | 1.014-1.409 |        |
| rs2430561 | M VS. W      | Ben-Ari <i>et al.</i>    | 1.190 | 1.010-1.401 | Fixed  |
|           |              | Nieters <i>et al.</i>    | 1.202 | 0.998-1.448 |        |
|           |              | Saxena <i>et al.</i>     | 1.115 | 0.937-1.327 |        |
|           |              | Bouzgarrou <i>et al.</i> | 1.159 | 0.975-1.377 |        |
|           |              | Bahgat <i>et al.</i>     | 1.165 | 0.986-1.375 |        |

|           |                          |       |             |       |
|-----------|--------------------------|-------|-------------|-------|
|           | Teixeira <i>et al.</i>   | 2.212 | 1.320-3.705 |       |
|           | Kim <i>et al.</i>        | 1.557 | 1.029-2.354 |       |
|           | Migita <i>et al.</i>     | 1.630 | 1.094-2.428 |       |
| MM vs. WW | Ben-Ari <i>et al.</i>    | 1.683 | 1.123-2.523 | Fixed |
|           | Nieters <i>et al.</i>    | 1.630 | 1.094-2.428 |       |
|           | Saxena <i>et al.</i>     | 1.372 | 0.875-2.150 |       |
|           | Bouzgarrou <i>et al.</i> | 1.613 | 1.025-2.538 |       |
|           | Bahgat <i>et al.</i>     | 1.581 | 1.045-2.393 |       |
|           | Teixeira <i>et al.</i>   | 1.035 | 0.813-1.317 |       |
|           | Kim <i>et al.</i>        | 1.126 | 0.886-1.431 |       |
| WM vs. WW | Migita <i>et al.</i>     | 1.078 | 0.860-1.351 | Fixed |
|           | Ben-Ari <i>et al.</i>    | 1.051 | 0.842-1.311 |       |
|           | Nieters <i>et al.</i>    | 1.014 | 0.772-1.333 |       |
|           | Saxena <i>et al.</i>     | 1.045 | 0.830-1.314 |       |
|           | Bouzgarrou <i>et al.</i> | 1.082 | 0.861-1.358 |       |
|           | Bahgat <i>et al.</i>     | 1.067 | 0.854-1.333 |       |
|           | Teixeira <i>et al.</i>   | 1.131 | 0.895-1.429 |       |

|          |              |                          |       |              |        |
|----------|--------------|--------------------------|-------|--------------|--------|
|          |              | Kim <i>et al.</i>        | 1.185 | 0.940-1.493  |        |
|          |              | Migita <i>et al.</i>     | 1.152 | 0.927-1.430  |        |
|          |              | Ben-Ari <i>et al.</i>    | 1.127 | 0.912-1.394  |        |
|          |              | Nieters <i>et al.</i>    | 1.121 | 0.867-1.449  |        |
|          |              | Saxena <i>et al.</i>     | 1.088 | 0.871-1.358  |        |
|          |              | Bouzgarrou <i>et al.</i> | 1.132 | 0.908-1.411  |        |
|          |              | Bahgat <i>et al.</i>     | 1.128 | 0.911-1.397  |        |
|          |              | Teixeira <i>et al.</i>   | 2.155 | 1.381-3.363  |        |
|          |              | Kim <i>et al.</i>        | 1.502 | 1.049-2.150  |        |
|          |              | Migita <i>et al.</i>     | 1.564 | 1.104-2.216  |        |
|          | MM vs. MW+WW | Ben-Ari <i>et al.</i>    | 1.624 | 1.140-2.313  | Fixed  |
|          |              | Nieters <i>et al.</i>    | 1.564 | 1.104-2.216  |        |
|          |              | Saxena <i>et al.</i>     | 1.351 | 0.912-2.001  |        |
|          |              | Bouzgarrou <i>et al.</i> | 1.488 | 0.998-2.220  |        |
|          |              | Bahgat <i>et al.</i>     | 1.492 | 1.035-2.150  |        |
| rs568408 | M VS. W      | Elsayed <i>et al.</i>    | 1.105 | 0.573-2.130  | Random |
|          |              | Tan <i>et al.</i>        | 3.387 | 0.658-17.429 |        |

|           |              |                       |       |              |        |
|-----------|--------------|-----------------------|-------|--------------|--------|
|           |              | Liu <i>et al.</i>     | 2.458 | 0.245-24.688 |        |
|           |              | Elsayed <i>et al.</i> | 1.404 | 0.384-5.130  |        |
|           | MM vs. WW    | Tan <i>et al.</i>     | 5.738 | 0.800-41.130 | Random |
|           |              | Liu <i>et al.</i>     | 3.304 | 0.111-98.066 |        |
|           |              | Elsayed <i>et al.</i> | 1.112 | 0.552-2.242  |        |
|           | WM vs. WW    | Tan <i>et al.</i>     | 3.203 | 0.704-14.572 | Random |
|           |              | Liu <i>et al.</i>     | 2.294 | 0.248-21.224 |        |
|           |              | Elsayed <i>et al.</i> | 1.123 | 0.538-2.345  |        |
|           | MM+MW vs. WW | Tan <i>et al.</i>     | 3.629 | 0.677-19.444 | Random |
|           |              | Liu <i>et al.</i>     | 2.538 | 0.225-28.688 |        |
|           |              | Elsayed <i>et al.</i> | 1.356 | 0.450-4.085  |        |
|           | MM vs. MW+WW | Tan <i>et al.</i>     | 4.244 | 0.788-22.861 | Random |
|           |              | Liu <i>et al.</i>     | 2.731 | 0.146-50.933 |        |
|           |              | Saxena <i>et al.</i>  | 1.126 | 1.039-1.221  |        |
| rs3212227 | M VS. W      | Elsayed <i>et al.</i> | 1.145 | 1.056-1.242  | Fixed  |
|           |              | Nieters <i>et al.</i> | 1.134 | 1.043-1.232  |        |
|           |              | Tan <i>et al.</i>     | 1.140 | 1.043-1.247  |        |

|           |                          |       |             |       |
|-----------|--------------------------|-------|-------------|-------|
|           | Ognjanovic <i>et al.</i> | 1.128 | 1.040-1.224 |       |
|           | Liu <i>et al.</i>        | 1.176 | 1.066-1.297 |       |
|           | Yang <i>et al.</i>       | 1.100 | 1.003-1.206 |       |
|           | Saxena <i>et al.</i>     | 1.257 | 1.052-1.501 |       |
|           | Elsayed <i>et al.</i>    | 1.291 | 1.080-1.543 |       |
|           | Nieters <i>et al.</i>    | 1.277 | 1.072-1.520 |       |
| MM vs. WW | Tan <i>et al.</i>        | 1.287 | 1.053-1.572 | Fixed |
|           | Ognjanovic <i>et al.</i> | 1.277 | 1.072-1.520 |       |
|           | Liu <i>et al.</i>        | 1.401 | 1.119-1.752 |       |
|           | Yang <i>et al.</i>       | 1.177 | 0.956-1.448 |       |
|           | Saxena <i>et al.</i>     | 1.167 | 1.026-1.328 |       |
|           | Elsayed <i>et al.</i>    | 1.213 | 1.067-1.380 |       |
|           | Nieters <i>et al.</i>    | 1.155 | 1.011-1.319 |       |
| WM vs. WW | Tan <i>et al.</i>        | 1.191 | 1.036-1.300 | Fixed |
|           | Ognjanovic <i>et al.</i> | 1.158 | 1.015-1.321 |       |
|           | Liu <i>et al.</i>        | 1.209 | 1.036-1.412 |       |
|           | Yang <i>et al.</i>       | 1.148 | 0.994-1.325 |       |

|           |              |                          |       |             |       |
|-----------|--------------|--------------------------|-------|-------------|-------|
|           |              | Saxena <i>et al.</i>     | 1.193 | 1.056-1.349 |       |
|           |              | Elsayed <i>et al.</i>    | 1.238 | 1.094-1.400 |       |
|           |              | Nieters <i>et al.</i>    | 1.188 | 1.047-1.348 |       |
|           | MM+MW vs. WW | Tan <i>et al.</i>        | 1.218 | 1.066-1.392 | Fixed |
|           |              | Ognjanovic <i>et al.</i> | 1.190 | 1.050-1.349 |       |
|           |              | Liu <i>et al.</i>        | 1.256 | 1.083-1.457 |       |
|           |              | Yang <i>et al.</i>       | 1.163 | 1.013-1.335 |       |
|           |              | Saxena <i>et al.</i>     | 1.163 | 0.998-1.355 |       |
|           |              | Elsayed <i>et al.</i>    | 1.170 | 1.003-1.364 |       |
|           |              | Nieters <i>et al.</i>    | 1.175 | 1.010-1.367 |       |
|           | MM vs. MW+WW | Tan <i>et al.</i>        | 1.180 | 0.991-1.405 | Fixed |
|           |              | Ognjanovic <i>et al.</i> | 1.175 | 1.010-1.367 |       |
|           |              | Liu <i>et al.</i>        | 1.272 | 1.049-1.541 |       |
|           |              | Yang <i>et al.</i>       | 1.114 | 0.930-1.335 |       |
|           |              | Chanthra <i>et al.</i>   | 1.257 | 1.152-1.371 |       |
| rs7574865 | M VS. W      | Chen <i>et al.</i>       | 1.322 | 1.202-1.454 | Fixed |
|           |              | Chen <i>et al.</i>       | 1.267 | 1.145-1.403 |       |

|              |                        |       |             |       |
|--------------|------------------------|-------|-------------|-------|
|              | Clark <i>et al.</i>    | 1.266 | 1.160-1.382 |       |
|              | Kim <i>et al.</i>      | 1.236 | 1.127-1.356 |       |
|              | Liao <i>et al.</i>     | 1.285 | 1.177-1.403 |       |
|              | Chanthra <i>et al.</i> | 1.626 | 1.320-2.002 |       |
|              | Chen <i>et al.</i>     | 1.718 | 1.372-2.152 |       |
| MM vs. WW    | Chen <i>et al.</i>     | 1.639 | 1.288-2.086 | Fixed |
|              | Clark <i>et al.</i>    | 1.636 | 1.326-2.017 |       |
|              | Kim <i>et al.</i>      | 1.607 | 1.291-2.001 |       |
|              | Liao <i>et al.</i>     | 1.725 | 1.396-2.131 |       |
|              | Chanthra <i>et al.</i> | 1.307 | 1.058-1.614 |       |
|              | Chen <i>et al.</i>     | 1.273 | 1.015-1.596 |       |
| WM vs. WW    | Chen <i>et al.</i>     | 1.278 | 1.002-1.629 | Fixed |
|              | Clark <i>et al.</i>    | 1.279 | 1.035-1.58  |       |
|              | Kim <i>et al.</i>      | 1.312 | 1.053-1.635 |       |
|              | Liao <i>et al.</i>     | 1.363 | 1.100-1.688 |       |
| MM+MW vs. WW | Chanthra <i>et al.</i> | 1.465 | 1.198-1.791 | Fixed |
|              | Chen <i>et al.</i>     | 1.485 | 1.197-1.842 |       |



|              |                        |       |             |       |
|--------------|------------------------|-------|-------------|-------|
|              | Chen <i>et al.</i>     | 1.450 | 1.150-1.827 |       |
|              | Clark <i>et al.</i>    | 1.451 | 1.186-1.775 |       |
|              | Kim <i>et al.</i>      | 1.452 | 1.177-1.791 |       |
|              | Liao <i>et al.</i>     | 1.539 | 1.255-1.887 |       |
|              | Chanthra <i>et al.</i> | 1.297 | 1.159-1.451 |       |
|              | Chen <i>et al.</i>     | 1.409 | 1.244-1.595 |       |
| MM vs. MW+WW | Chen <i>et al.</i>     | 1.322 | 1.157-1.510 | Fixed |
|              | Clark <i>et al.</i>    | 1.320 | 1.179-1.479 |       |
|              | Kim <i>et al.</i>      | 1.269 | 1.124-1.432 |       |
|              | Liao <i>et al.</i>     | 1.327 | 1.184-1.486 |       |

---

**CI:** confidential interval

**Table S3.** Egger's regression test for polymorphisms in genes of IL-12 signaling pathway

| <b>Gene</b>                    | <b>Polymorphism</b> | <b>Egger's test</b>            |
|--------------------------------|---------------------|--------------------------------|
|                                |                     | <b><math>P &gt;  t </math></b> |
| <i>IL18</i>                    | rs1946518           | 0.621                          |
| <i>IL18</i>                    | rs187238            | 0.551                          |
| <i>IFN-<math>\gamma</math></i> | rs2430561           | 0.824                          |
| <i>IL12A</i>                   | rs568408            | 0.673                          |
| <i>IL12B</i>                   | rs3212227           | 0.999                          |
| <i>STAT4</i>                   | rs7574865           | 0.651                          |
